# Supplementary material
Source: publisher site journal article supplement (https://www.dovepress.com/article/423322)
Supplement: Supplementary file 1 [file get_supplementary_file.php]

Supplementary Table 1 Parameters related to glycemic control from week 4 to week 6

|  | Metformin  (n=8) | Metformin+  Pioglitzone (n=7) | Dapagliflozin  (n=13) | P value |
| --- | --- | --- | --- | --- |
| With medication | | | | |
| Mean glucose (mmol/L) | 6.22±1.41 | 5.95±1.73 | 7.35±2.84 | 0.350 |
| LGBI | 1.97 (0.16, 4.81) | 1.85 (0.45, 2.93) | 1.37 (0.24, 1.98) | 0.524 |
| HGBI | 1.23 (0.27, 2.05) | 1.23 (0.01, 4.11) | 2.68 (0.51, 6.27) | 0.349 |
| MAGE (mmol/L) | 3.49±1.92 | 3.15±1.67 | 4.39±2.40 | 0.414 |
| TBR (%) | 0.00 (0.00, 0.19) | 0.00 (0.00, 0.04) | 0.00 (0.00, 0.00) | 0.403 |
| TIR (%) | 0.88±0.15 | 0.82±0.36 | 0.80±0.25 | 0.774 |
| TAR (%) | 0.00 (0.00, 0.02) | 0.00 (0.00, 0.10) | 0.02 (0.00, 0.32) | 0.355 |
| Without medication | | | | |
| Mean glucose (mmol/L) | 5.87±1.79 | 5.71±1.16 | 7.94±3.59 | 0.137 |
| LGBI | 2.34 (0.90, 10.66) | 2.08 (1.53, 3.99) | 0.17 (0.00, 2.43) | 0.078 |
| HGBI | 1.26 (0.55, 3.60) | 1.38 (1.09, 1.90) | 1.98 (0.88, 6.78) | 0.640 |
| MAGE (mmol/L) | 4.25±1.91 | 3.26±1.01 | 4.48±3.40 | 0.607 |
| TBR (%) | 0.01 (0.00, 0.39) | 0.00 (0.00, 0.09) | 0.00 (0.00, 0.00) | 0.206 |
| TIR (%) | 0.78±0.24 | 0.86±0.30 | 0.79±0.29 | 0.822 |
| TAR (%) | 0.00 (0.00, 0.07) | 0.00 (0.00, 0.01) | 0.00 (0.00, 0.34) | 0.416 |

Data are presented as mean ± standard deviation or median (interquartile range) as appropriate.

Analysis of variance (ANOVA) for comparison of normally distributed data; and Kruskal-Wallis H test for comparison of asymmetrically distributed data.

Abbreviations: LBGI, low blood glucose index; HBGI, high blood glucose index; MAGE, mean amplitude of glycemic excursions; TBR, time below range; TIR, time in range; TAR, time above range.
